# Supplementary material
Source: publisher site journal article supplement (https://www.spandidos-publications.com/7124/downloadSupplementary)
Supplement: Supplementary file 1 [file downloadSupplementary]

## Sheet: Sheet1
Table SI. Panel of 82 known cancer genes for next-generation sequencing.
Gene
ABCB1
ABCC4
AKT1
ALK
APC
ATIC
ATM
BRAF
C8orf34
CBR3
CDA
CDC5L
CDKN2A
CMPK1
CTNNB1
CYBA
CYP19A1
CYP2D6
DCK
DHFR
DPYD
DYNC2H1
EGFR
ERBB2
ERBB4
ERCC1
ESR1
ESR2
FBXW7
FGFR2
FGFR3
FOLR3
GALNT14
GGH
GNA11
GNAQ
GNAS
GSTP1
HRAS
IDH1
IDH2
KDR
KIT
KRAS
MAP2K1
MET
MTHFR
MTOR
MTRR
NCF4
NOS3
NOTCH1
NQO1
NRAS
NT5C2
NTRK1
NTRK2
NTRK3
PAPD7
PDGFRA
PIK3CA
PTEN
RAC2
RB1
RET
ROS1
RRM1
SEMA3C
SLC19A1
SLC29A1
SMAD4
SMO
SOD2
STK11
TP53
TPMT
TYMS
UGT1A1
UMPS
VHL
XPC
XRCC1
